# Supplementary material for: A Novel Function of Human Pumilio Proteins in Cytoplasmic Sensing of Viral Infection
Source: PubMed Central journal article supplement (PMC4207803; doi:10.1371/journal.ppat.1004417), 2014-10-23

IFN- $\beta$  (-)

IFN- $\beta$  (+)

siN.C.

siPUM1#1

siPUM2#1

siN.C.

siPUM1#1

siPUM2#1

IB: RIG-I

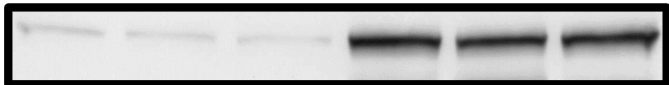

IB: MDA5

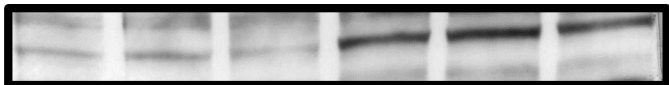

IB: LGP2

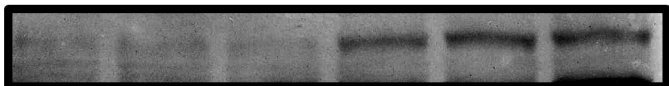

IB:  $\beta$ -actin

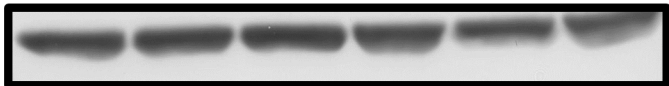

Supplement: ppat.1004417.s002.pdf [file ppat.1004417.s002.pdf]
