# Supplementary material for: A Novel Function of Human Pumilio Proteins in Cytoplasmic Sensing of Viral Infection
Source: PubMed Central journal article supplement (PMC4207803; doi:10.1371/journal.ppat.1004417), 2014-10-23

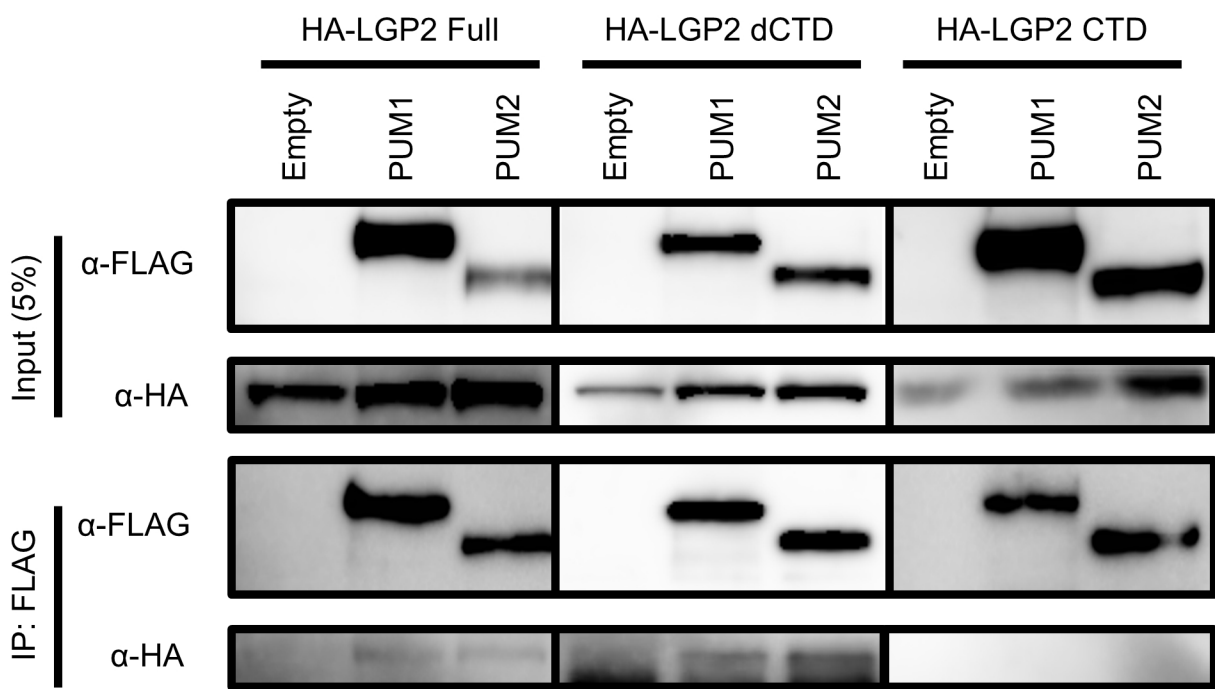

Supplement: ppat.1004417.s004.pdf [file ppat.1004417.s004.pdf]
