# Supplementary material for: A Novel Function of Human Pumilio Proteins in Cytoplasmic Sensing of Viral Infection
Source: PubMed Central journal article supplement (PMC4207803; doi:10.1371/journal.ppat.1004417), 2014-10-23

Input

GST pull down

-

25/25c

-

25/25c

- PUM1 PUM2

- PUM1 PUM2

- PUM1 PUM2

- PUM1 PUM2

IB: GST  
(PUM1/2)

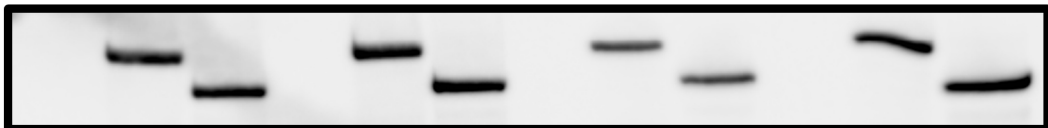

IB: Flag  
(LGP2)

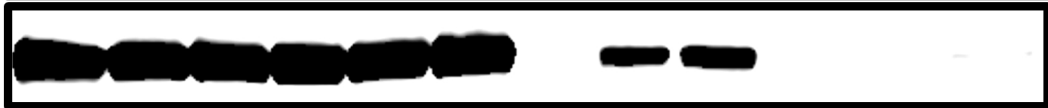

Supplement: ppat.1004417.s007.pdf [file ppat.1004417.s007.pdf]
